# Supplementary material for: Nanocomposites of organo-montmorillonite/polystyrene latex particles via free radical miniemulsion polymerization
Source: Royal Society of Chemistry journal article supplement (doi:10.1039/d4ra08943j), 2025-01-01
Supplement: d4ra08943j1.pdf [file d4ra08943j1.pdf]

## Supporting Information

For

### Nanocomposites of organo-montmorillonite/polystyrene latex particles via free radical miniemulsion polymerization

Ahmed Akelah, Ahmed Rehab, Hisham Harhash, Mohamed A Abdelwahab\*, Hamada S. A. Mandour

Polymer Research Group, Chemistry Department, Faculty of Science, Tanta University, Tanta, 31527, Egypt.

\*Corresponding author: [mohamed.abdelwahab@science.tanta.edu.eg](mailto:mohamed.abdelwahab@science.tanta.edu.eg)

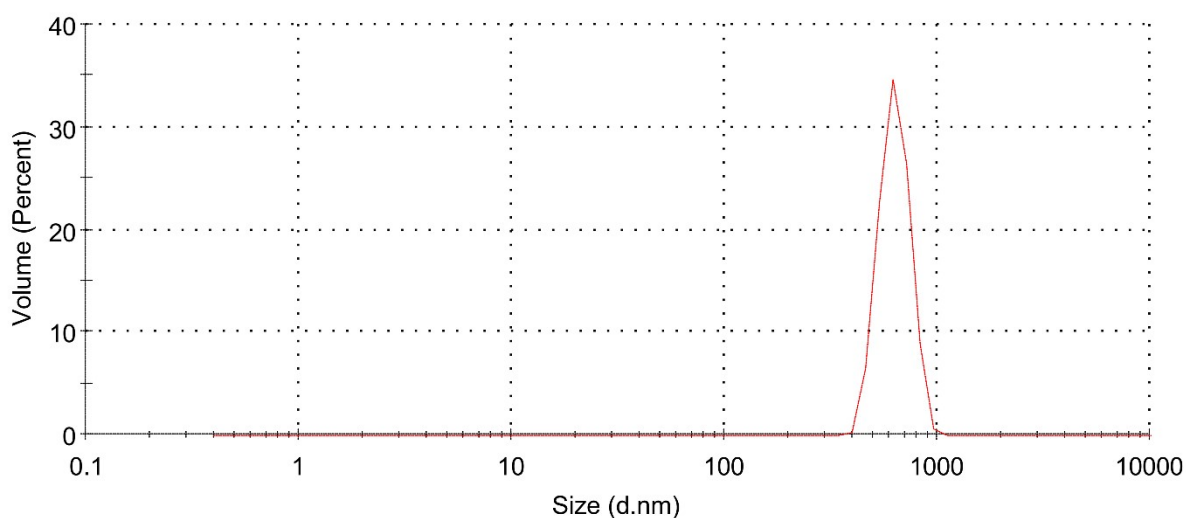

**Figure S1:** DLS plot of MMT-ADM<sub>18</sub>

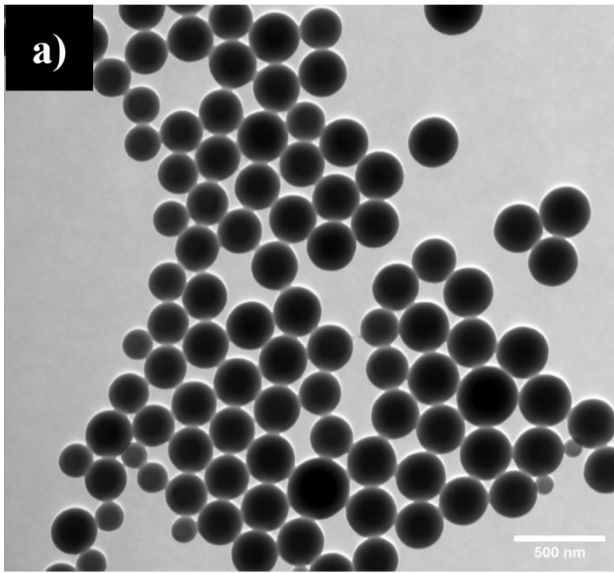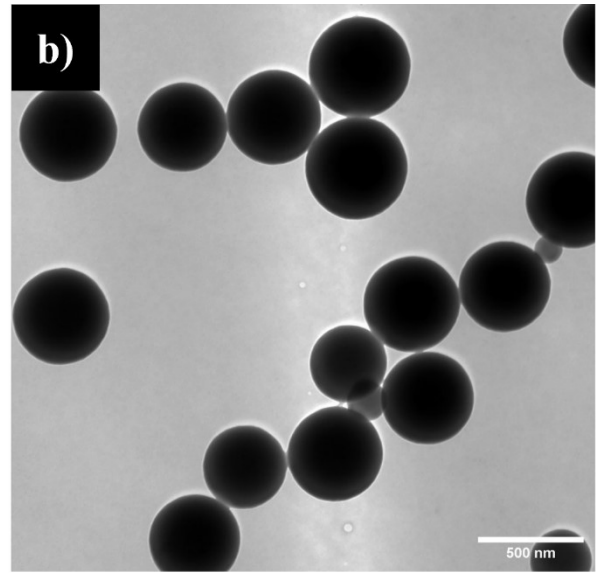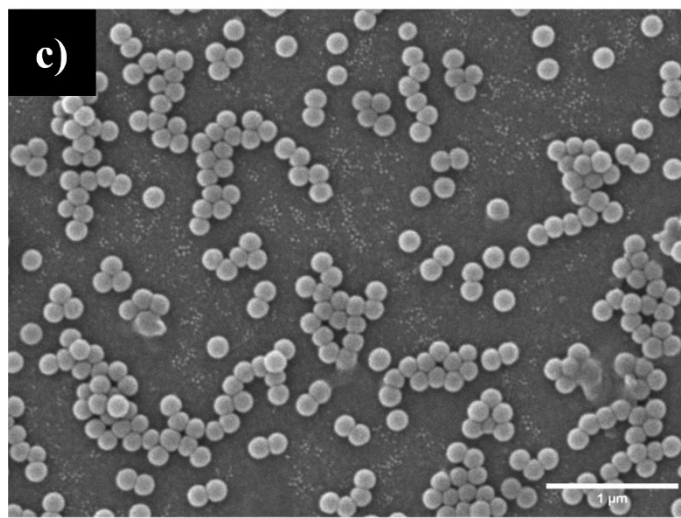

**Figure S2:** TEM images of the final latex for samples with (a) 1% MMT-ADM<sub>18</sub>, (b) 3% MMT-ADM<sub>18</sub>, and (c) SEM image of final latex with 5% MMT-ADM<sub>18</sub>.
